# Supplementary material for: Soybean (Glycine max L. Merr.) seedlings response to shading: leaf structure, photosynthesis and proteomic analysis
Source: PubMed Central journal article supplement (PMC6341755; doi:10.1186/s12870-019-1633-1), 2019-01-21
Supplement: 12870_2019_1633_MOESM2_ESM.pdf [file 12870_2019_1633_MOESM2_ESM.pdf]

**Table S1.** List of primers for characterizing Glycine max genes

| <b>Gene Location<br/>(Annotation)</b> | <b>Protein<br/>Location</b> | <b>Forward primer</b>     | <b>Reverse primer</b>   |
|---------------------------------------|-----------------------------|---------------------------|-------------------------|
| <i>LOC100813807</i>                   | A0A0R4J3L3                  | TGGCCTGCCGGGATTT          | CAATGCCGGCAGATTTTCG     |
| <i>LOC100779933(Gogh)</i>             | Q9XE94                      | AACTCCCCCTACGTTCTGCATT    | GCTTCTCACCAACCCCATTG    |
| <i>LOC100784051</i>                   | A0A0R0H273                  | TGACACTGAGATGGAGCAATACAAC | CATCATTGAGCTCCCAGATGA   |
| <i>LOC100799813</i>                   | A0A0R4J5I3                  | CTGGTGAGCCCCCATCCTA       | CAGCAGTGTCCTCAACCATAGTC |
| <i>LOC100793702(Cab-6)</i>            | Q93YG3                      | ATGGGACACTGCTGGACTATCA    | CTCCAGCTCCCGGTTCT       |
| <i>LOC100820335</i>                   | I1MZ32                      | GGAGGTCGCCGACGTAAA        | ATCCCGAAAACCTCCGAGTAG   |
| <i>LOC100796767</i>                   | I1M3X9                      | GCATTGAAGGAAGATCCAGAACA   | ACTCGAGCCCACTCTTCCAA    |
| <i>LOC100526972</i>                   | ILLA7                       | GGCATCAAGGGCACCAAAT       | GCCTCCTCCAGCACTCACTATG  |
| <i>GLYMA_08G188500</i>                | A0A0R0IP95                  | ACCCAGAGGGAGAGCAAGA       | CTCTGCCTGGTCAAGAATGCA   |
